# Supplementary material for: N-doped, S-doped TiO2nanocatalysts: synthesis, characterization and photocatalytic activity in the presence of sunlight
Source: Royal Society of Chemistry journal article supplement (doi:10.1039/c4ra08858a), 2015-01-01
Supplement: c4ra08858a1.pdf [file c4ra08858a1.pdf]

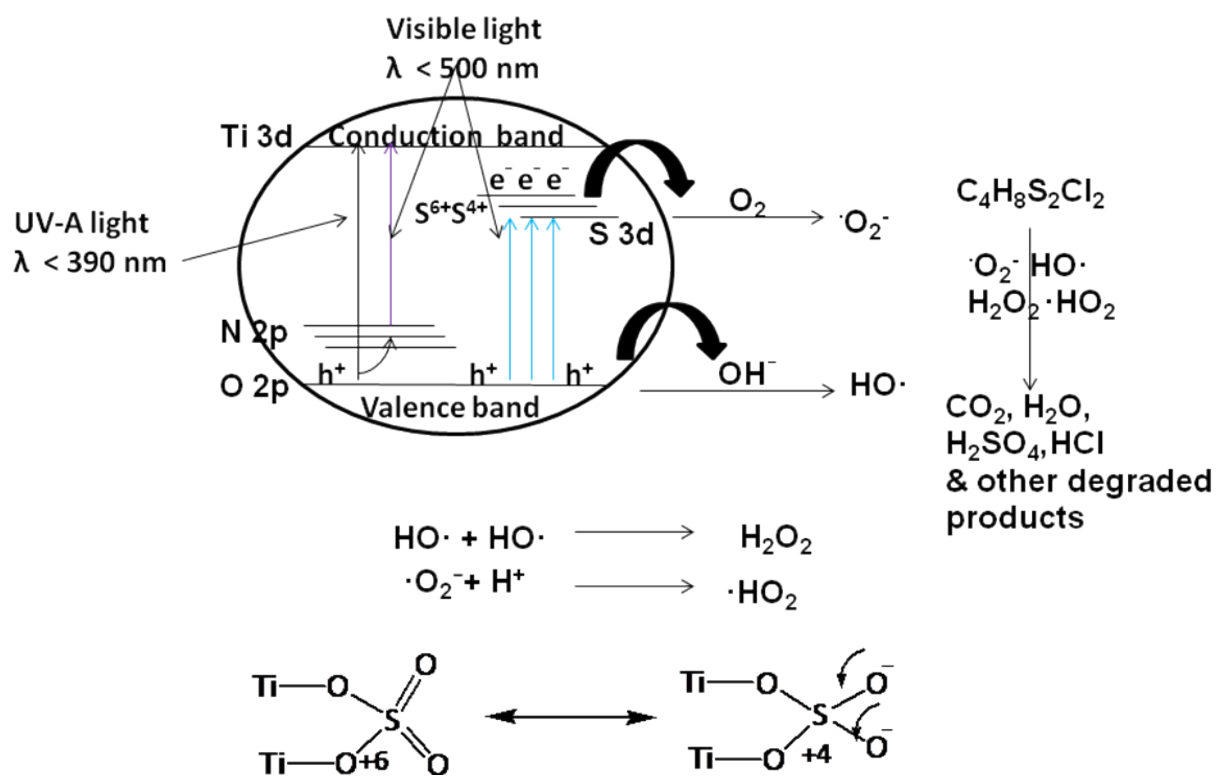

Fig.1. Proposed mechanism of S and N-TiO<sub>2</sub>

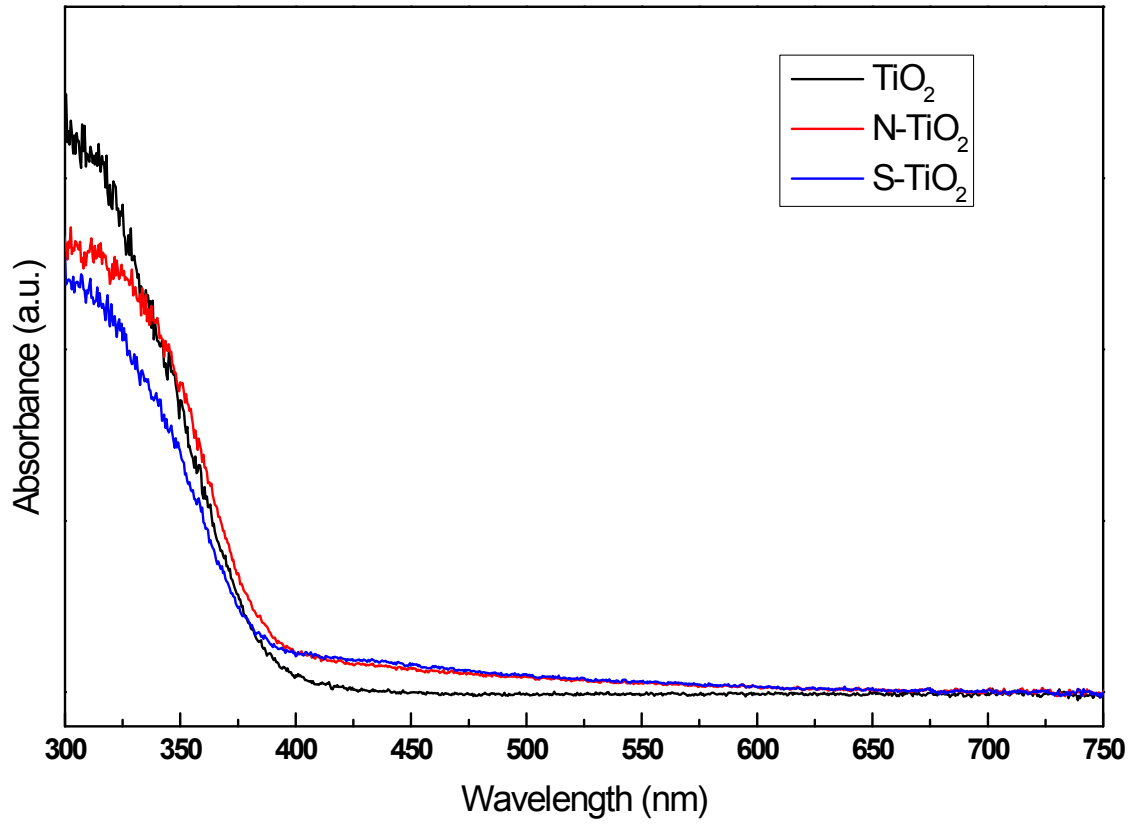

Fig. 2. UV-vis spectra of TiO<sub>2</sub>, N-TiO<sub>2</sub> and S-TiO<sub>2</sub> annealed at 450°C in Ar atmosphere.

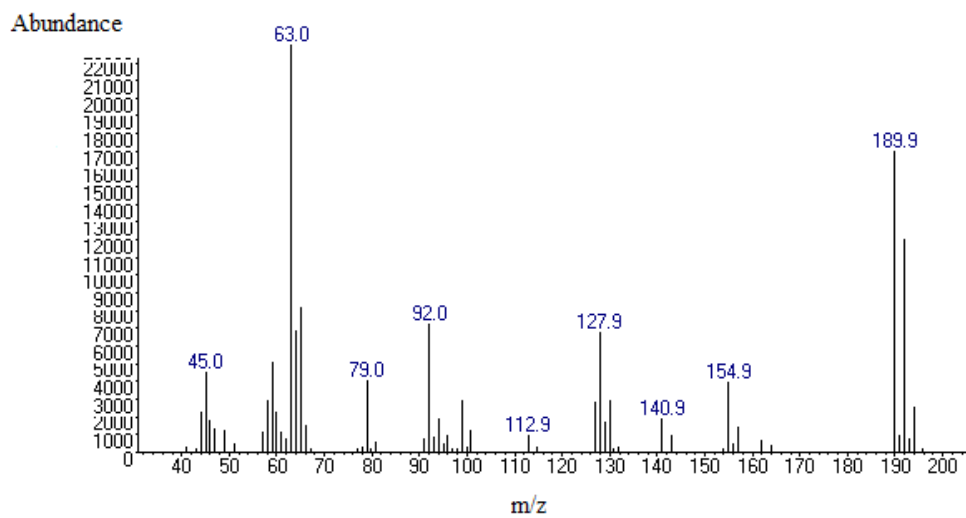

Fig. 3(a)

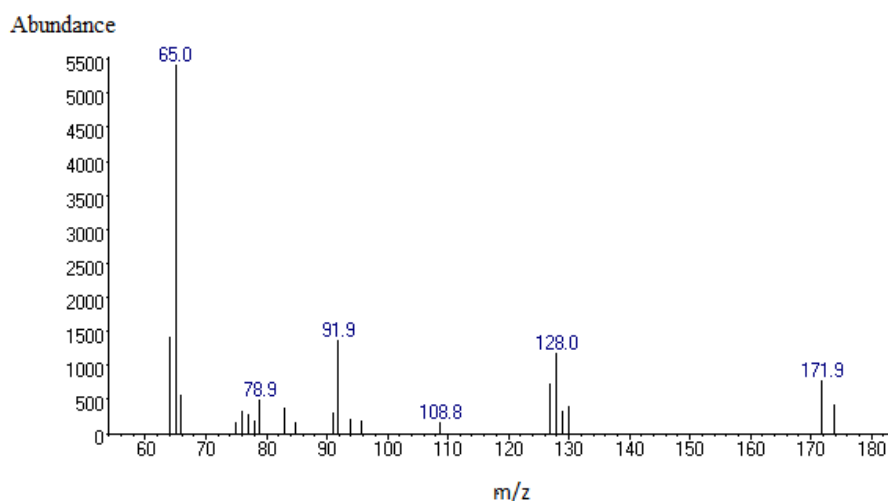

Fig. 3(b)

Fig. 3(a-b) Mass spectras of (a) HD Disulfide b) 2-(2-Chloro-ethyl)disulfanyl-ethanol

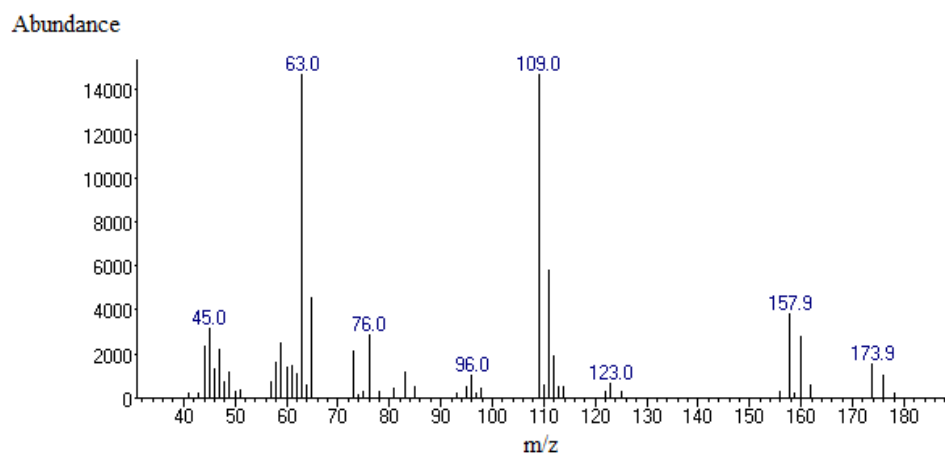

Fig. 3(c)

Fig. 3(c) GC-MS spectra of HD sulfoxide
